# Supplementary material for: Significant surface-enhanced Raman scattering effect of Ag-loaded iron hydroxide enabled by coordination effect between Ag and hydroxyl group
Source: Royal Society of Chemistry journal article supplement (doi:10.1039/d3qi00312d), 2023-01-01
Supplement: d3qi00312d1.pdf [file d3qi00312d1.pdf]

## Supporting Information

### Significant Surface-enhanced Raman Scattering Effect of Ag Loaded Iron

### Hydroxide Enabled by Coordination Effect between Ag and Hydroxyl Group

Xiangyu Meng<sup>‡a</sup>, Jian Yu<sup>‡a</sup>, Jingjing Wu<sup>a</sup>, Yuening Wang<sup>a</sup>, Xiaoyu Song<sup>a</sup>, Ziyang Xu<sup>a</sup>,  
Anran Li<sup>\*a</sup>, Lin Qiu<sup>\*c</sup>, Jie Lin<sup>\*b</sup>, and Xiaotian Wang<sup>\*a</sup>

<sup>a</sup> School of Chemistry, and School of Engineering Medicine, Beijing Advanced Innovation Center for Big Data-Based Precision Medicine, Beihang University, Beijing 100191, China; Key Laboratory of Big Data-Based Precision Medicine (Beihang University), Ministry of Industry and Information Technology.

<sup>b</sup> Cixi Institute of Biomedical Engineering, Ningbo Institute of Materials Technology and Engineering, CAS, 1219 Zhongguan West Road, Ningbo 315201, P. R. China.

<sup>c</sup> School of Energy and Environmental Engineering, University of Science and Technology Beijing, Beijing 100083, China.

<sup>‡</sup> Co-first author. These two authors contributed equally to this manuscript.

\*Corresponding authors. E-mail:

[wangxt@buaa.edu.cn](mailto:wangxt@buaa.edu.cn) (Xiaotian Wang);

[qiulin@ustb.edu.cn](mailto:qiulin@ustb.edu.cn) (Lin Qiu)

[linjie@nimte.ac.cn](mailto:linjie@nimte.ac.cn) (Jie Lin)

[rananli@buaa.edu.cn](mailto:rananli@buaa.edu.cn) (Anran Li)

Table S1. List of abbreviations.

Table S2. Raman spectral peak assignments of MB, CV, and 4ATP.

Figure S1. XRD of Ag NPs and Ag/ M hydroxide (M = Fe, Co, Ni) complex.

Figure S2. TEM image of commercial Ag NPs with the size of 5 nm.

Figure S3. XPS spectra of Fe<sup>3+</sup>, Co<sup>2+</sup> and Ni<sup>2+</sup> in Ag/Fe(OH)<sub>3</sub>, Ag/Co(OH)<sub>2</sub> and Ag/Ni(OH)<sub>2</sub>, respectively.

Figure S4. Absorption spectra of Fe(OH)<sub>3</sub> and Ag/Fe(OH)<sub>3</sub>.

Figure S5. TEM image of Ag/Fe(OH)<sub>3</sub> with different mass fraction of Ag.

Figure S6. The band gap of Ag/Fe(OH)<sub>3</sub> with different content of Ag based on the Kubelka-Munk formula.

Figure S7. (a) SERS intensity of 4-ATP with different concentration absorbed on 50% Ag/Fe(OH)<sub>3</sub>. (b) SERS spectra of 4-ATP (10<sup>-4</sup> M) absorbed on 50% Ag/Fe(OH)<sub>3</sub> and pure molecule (10<sup>-1</sup> M) without substrate.

Table S1. List of abbreviations.

| Number | Full forms                                     | Abbreviation |
|--------|------------------------------------------------|--------------|
| 1      | Surface-enhanced Raman Scattering spectroscopy | SERS         |
| 2      | P-aminoazobenzene                              | PAAB         |
| 3      | Localized surface plasmon resonance            | LSPR         |
| 3      | Photo-induced charge transfer                  | PICT         |
| 4      | Enhancement factor                             | EF           |
| 5      | Electromagnetic enhancement mechanism          | EM           |
| 6      | Chemical enhancement mechanism                 | CM           |
| 7      | Finite-difference time-domain                  | FDTD         |
| 8      | X-ray powder diffraction                       | XRD          |
| 9      | Transmission electron microscopy               | TEM          |
| 10     | X-ray photoelectron spectroscopy               | XPS          |
| 11     | Ultraviolet photoelectron spectroscopy         | UPS          |
| 12     | Selected area electron diffraction             | SAED         |
| 13     | Rhodamine 6G                                   | R6G          |
| 14     | Crystal violet                                 | CV           |
| 15     | 4-aminophenylthiol                             | 4-ATP        |
| 16     | Conduction band                                | CB           |
| 17     | Valence band                                   | VB           |
| 18     | Highest occupied molecular orbital             | HOMO         |
| 19     | Lowest unoccupied molecular orbital            | LUMO         |

Table S2. Raman spectral peak assignments of MB, CV, and 4ATP.

|       | Raman shift (cm <sup>-1</sup> ) | Assignments                             |
|-------|---------------------------------|-----------------------------------------|
| R6G   | 1620                            | $\nu(\text{C-C})$ ring                  |
|       | 1513                            | $\nu_{\text{asym}}(\text{C-C})$         |
|       | 1430                            | $\nu_{\text{asym}}(\text{C-N})$         |
|       | 1396                            | $\alpha(\text{C-H})$                    |
|       | 1307                            | $\alpha(\text{C-H})$                    |
|       | 1151                            | $\beta(\text{C-H})$                     |
|       | 1181                            | $\nu(\text{C-C})$                       |
|       | 1035                            | $\beta(\text{C-H})$                     |
|       | 677                             | $\gamma(\text{C-H})$                    |
| CV    | 1615                            | $\nu(\text{C-C})$ ring                  |
|       | 1588                            | $\nu(\text{C-C})$ ring                  |
|       | 1532                            | $\nu(\text{C-H}) / \delta(\text{CH}_3)$ |
|       | 1447                            | $\gamma_{\text{asym}}(\text{CH}_3)$     |
|       | 1396                            | $\nu(\text{C-H})$                       |
|       | 1180                            | $\nu(\text{C-H})$ ring                  |
|       | 918                             | $\delta(\text{C-C})$ ring               |
|       | 818                             | $\nu(\text{C-H})$ ring                  |
|       | 728                             | $\nu(\text{C-N})$                       |
| 4-ATP | 1590                            | $\nu(\text{C-C})$ ring                  |
|       | 1575                            | $\nu(\text{C-C})$ ring                  |

---

|      |                                        |
|------|----------------------------------------|
| 1425 | $\delta(\text{CH}) + \nu(\text{C-C})$  |
| 1393 | $\delta(\text{C-H}) + \nu(\text{C-C})$ |
| 1142 | $\delta(\text{C-H})$                   |
| 1088 | $\nu(\text{C-S})$                      |

---

$\nu$ , stretching;  $\alpha$ , in-plane deformation;  $\beta$ , in-plane bending;  $\gamma$ , out-of-plane bending;  $\delta$ , skeletal deformation.

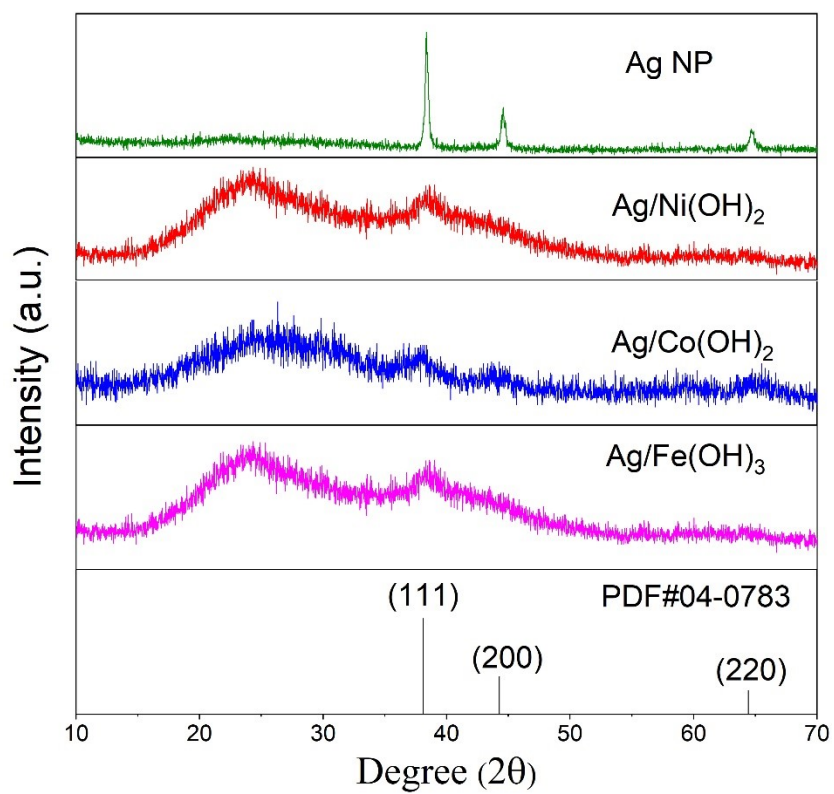

Figure S1. XRD of Ag NPs and Ag/M hydroxide (M = Fe, Co, Ni) complex.

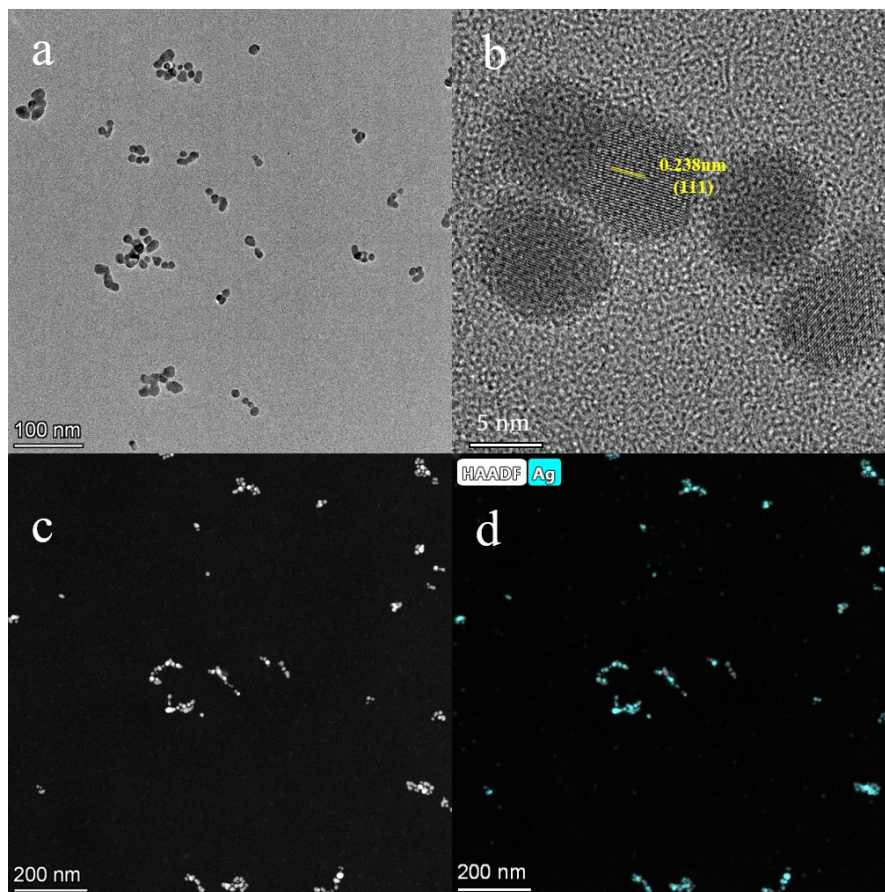

Figure S2. TEM image of commercial Ag NPs.

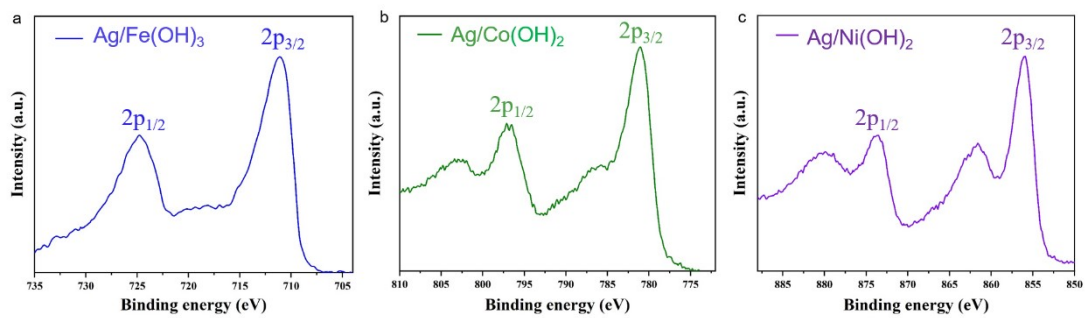

Figure S3. XPS spectra of Fe<sup>3+</sup>, Co<sup>2+</sup> and Ni<sup>2+</sup> in Ag/Fe(OH)<sub>3</sub>, Ag/Co(OH)<sub>2</sub> and Ag/Ni(OH)<sub>2</sub>, respectively.



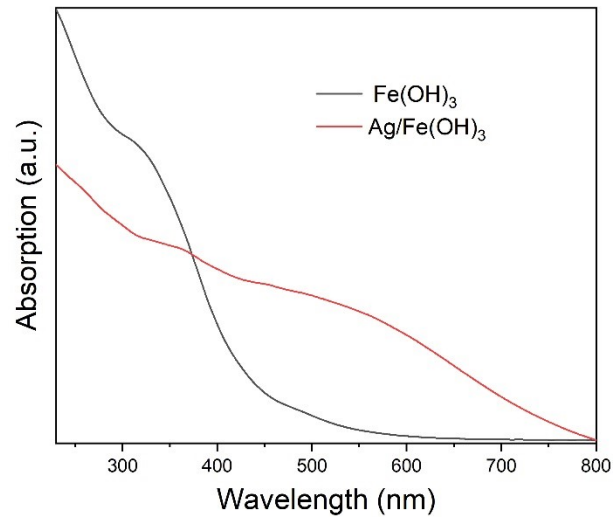

Figure S4. Absorption spectra of Fe(OH)<sub>3</sub> and Ag/Fe(OH)<sub>3</sub>.

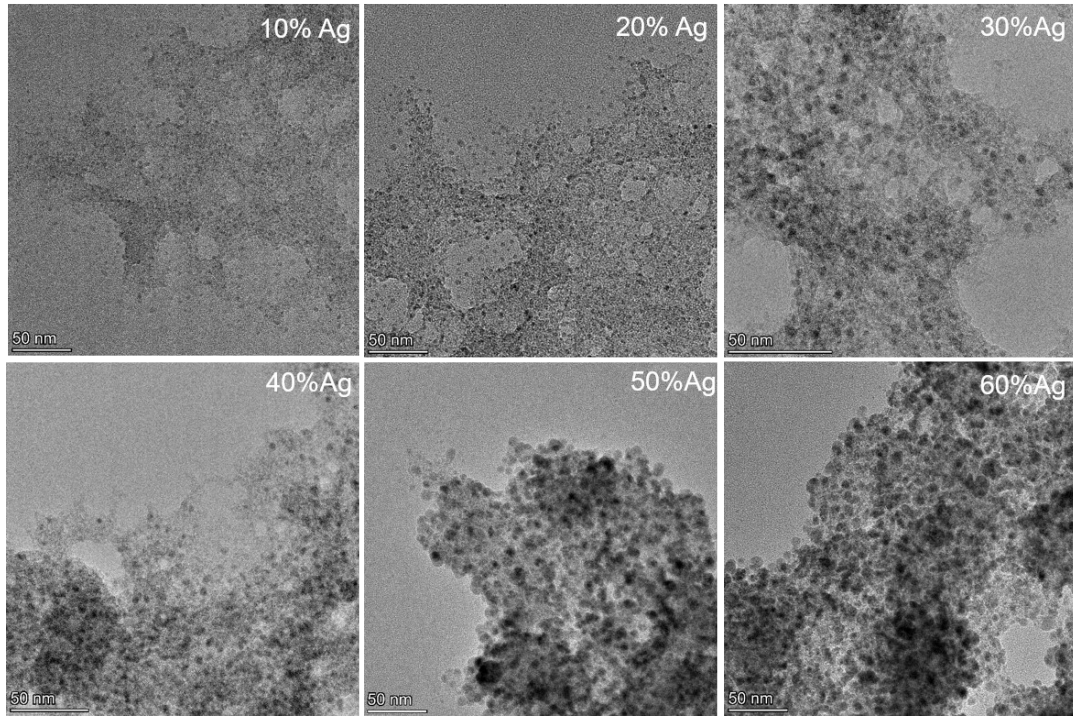

Figure S5. TEM image of Ag/Fe(OH)<sub>3</sub> with different mass fraction of Ag.

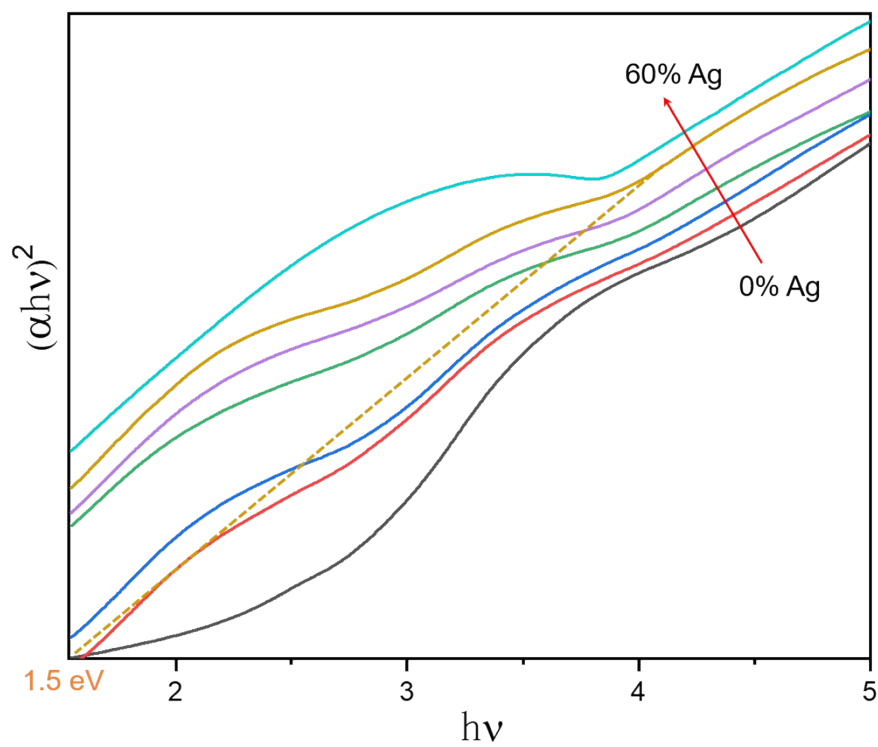

Figure S6. The band gap of Ag/Fe(OH)<sub>3</sub> with different content of Ag based on the Kubelka-Munk formula.

## Calculation of Enhancement Factor

Figure S7 present the SERS intensity of 4-ATP with different concentration. The concentration of  $10^{-4}$  M is selected to calculate the enhancement factor (EF) to avoid the error caused by supersaturated adsorption. EF for 50% Ag/Fe(OH)<sub>3</sub> is calculated by the following formula:

$$EF = \frac{I_{SERS}/N_{SERS}}{I_0/N_0} \quad (1)$$

where  $I_{SERS}$  and  $I_0$  is the intensity of vibration peaks of probe molecule absorbed on the substrate and without substrate ( $1590 \text{ cm}^{-1}$  for 4-ATP).  $N_{SERS}$  and  $N_0$  is the number of probe molecules on substrate and without the substrate, respectively.

In this experiment, 5 $\mu$ L of 4-ATP solution (0.1 M) was dropped onto the Si wafer ( $0.4 \times 0.4 \text{ cm}^2$ ).  $N_0$  is estimated by:

$$N_0 = 5 \mu\text{L} \times 0.1 \text{ mol/L} \times 6.02 \times 10^{23} \text{ mol}^{-1} \times 1.87 \mu\text{m}^2 / 0.16 \text{ cm}^2$$

$$N_{SERS} = \sigma \times 1.87 \mu\text{m}^2 \times 6.02 \times 10^{23} \text{ mol}^{-1}$$

The laser area is calculated to be  $1.87 \mu\text{m}^2$  for the laser of 633 nm, and the area of Si wafer is  $0.16 \text{ cm}^2$ ,  $N_0$  is estimated to  $3.51 \times 10^{10}$ .  $\sigma$  is the density of probe molecule adsorbed onto substrate, which is estimated to  $\sim 0.5 \text{ nM cm}^{-2}$ . Therefore,  $N_{SERS}$  is calculated to be  $5.63 \times 10^6$  for 4-ATP and PAAB.  $I_{SERS} = 11918$  and  $I_0 = 60$  for 4-ATP. Substituting these values into Eq. (1), EF are calculated to be  $1.23 \times 10^6$  for 4-ATP.

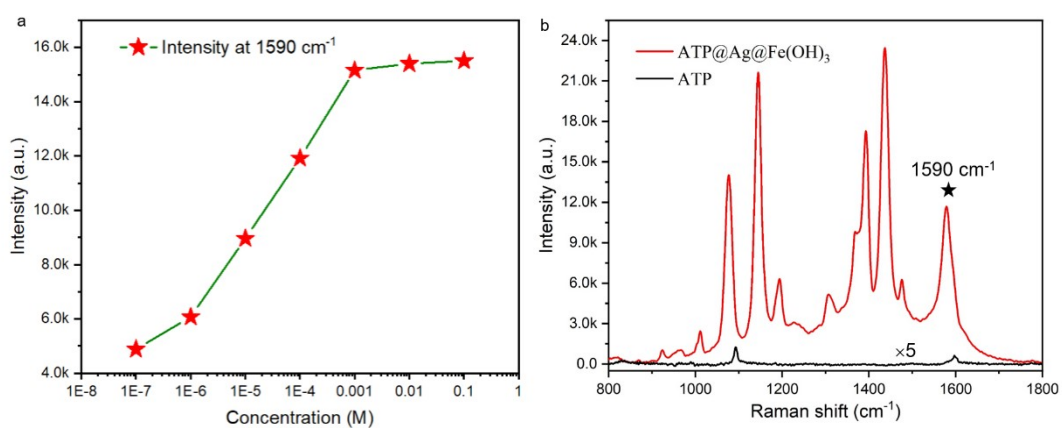

Figure S7. (a) SERS intensity of 4-ATP with different concentration absorbed on 50% Ag/Fe(OH)<sub>3</sub>. (b) SERS spectra of 4-ATP (10<sup>-4</sup> M) absorbed on 50% Ag/Fe(OH)<sub>3</sub> and pure molecule (10<sup>-1</sup> M) without substrate.
